# Supplementary material
Source: PubMed Central journal article supplement (PMC3387713)
Supplement: supp_pp.112.198283_198283supplemental_files.pdf [file supp_pp.112.198283_198283supplemental_files.pdf]

**Table S1.** Plant proteins containing HMG-box domain(s).

| <b>Protein</b> <sup>1,2</sup> | <b>Length (aa)</b> | <b>Mass (Da)</b> | <b>Locus</b> <sup>3</sup> | <b>Databases</b> <sup>4</sup> |
|-------------------------------|--------------------|------------------|---------------------------|-------------------------------|
| <b>HMGB</b>                   |                    |                  |                           |                               |
| AtHMGB1                       | 178                | 20265            | At3g51880                 |                               |
| AtHMGB2                       | 144                | 15982            | At1g20693                 |                               |
| AtHMGB3                       | 141                | 15681            | At1g20696                 |                               |
| AtHMGB4                       | 138                | 15364            | At2g17560                 |                               |
| AtHMGB5                       | 125                | 14203            | At4g35570                 |                               |
| AtHMGB6                       | 241                | 26964            | At5g23420                 |                               |
| AtHMGB14                      | 151                | 17481            | At2g34450                 |                               |
| BdHMGB1                       | 160                | 17347            | Bradi1g29730              | MIPS                          |
| BdHMGB2                       | 127                | 14781            | Bradi2g45927              | MIPS                          |
| BdHMGB3                       | 217                | 23410            | Bradi5g18460              | MIPS                          |
| BdHMGB4                       | 144                | 15737            | Bradi3g51140              | MIPS                          |
| BdHMGB5                       | 218                | 23816            | Bradi3g12920              | MIPS                          |
| BdHMGB6                       | 128                | 13997            | Bradi4g37247              | MIPS                          |
| CrHMGB3401                    | 179                | 19516            |                           |                               |
| CrHMGB3402 <sup>5</sup>       | 336                | 37857            |                           |                               |
| CrHMGB3404 <sup>5</sup>       | 200                | 22263            |                           |                               |
| CrHMGB3405 <sup>5</sup>       | 206                | 22663            |                           |                               |
| CrHMGB3406                    | 99                 | 11757            |                           |                               |
| GmHMGB1                       | 169                | 18863            | Glyma01g28820             | SUPFAM                        |
| GmHMGB2                       | 166                | 18371            | Glyma03g08270             | SUPFAM                        |
| GmHMGB3                       | 181                | 20249            | Glyma04g01840             | SUPFAM                        |
| GmHMGB4                       | 177                | 20610            | Glyma05g25900             | SUPFAM                        |
| GmHMGB5                       | 157                | 17310            | Glyma06g01970             | SUPFAM                        |
| GmHMGB6                       | 205                | 24591            | Glyma06g36940             | SUPFAM                        |
| GmHMGB7                       | 148                | 17318            | Glyma08g08840             | SUPFAM                        |
| GmHMGB8                       | 142                | 15928            | Glyma09g33070             | SUPFAM                        |
| GmHMGB9                       | 200                | 22433            | Glyma10g43440             | SUPFAM                        |
| MtHMGB1304                    | 155                | 16952            |                           |                               |
| MtHMGB1305                    | 170                | 19096            |                           |                               |
| MtHMGB1306                    | 152                | 17554            |                           |                               |
| MtHMGB1307                    | 142                | 15991            |                           |                               |
| MtHMGB1308                    | 111                | 12684            |                           |                               |
| OsHMGB1                       | 157                | 17100            | Os06g51220                |                               |
| OsHMGB705                     | 202                | 22328            | Os08g01100                |                               |

|            |     |       |            |        |
|------------|-----|-------|------------|--------|
| OsHMGB706  | 145 | 15765 | Os02g44930 |        |
| OsHMGB707  | 131 | 13873 | Os04g47690 |        |
| OsHMGB710  | 146 | 16349 | Os09g37910 |        |
| OsHMGB711  | 133 | 15566 | Os01g47600 |        |
| PpHMGB2    | 165 | 18684 |            |        |
| PpHMGB3    | 157 | 17517 |            |        |
| PpHMGB1504 | 207 | 23103 |            |        |
| PpHMGB1505 | 215 | 22675 |            |        |
| PtHMGB901  | 152 | 16531 |            |        |
| PtHMGB902  | 152 | 16709 |            |        |
| PtHMGB907  | 201 | 22544 |            |        |
| PtHMGB910  | 176 | 19879 |            |        |
| PtHMGB911  | 179 | 20033 |            |        |
| PtHMGB914  | 165 | 19322 |            |        |
| PtHMGB915  | 144 | 15916 |            |        |
| SbHMGB2602 | 126 | 13993 |            |        |
| SmHMGB1    | 156 | 17965 |            | GENOM  |
| VcHMGB6403 | 199 | 21506 |            |        |
| VvHMGB1    | 153 | 17168 |            | SUPFAM |
| VvHMGB2    | 175 | 20397 |            | SUPFAM |
| VvHMGB3    | 154 | 17137 |            | SUPFAM |
| VvHMGB4    | 128 | 14506 |            | SUPFAM |
| VvHMGB5    | 168 | 18888 |            | SUPFAM |
| VvHMGB6    | 190 | 21558 |            | SUPFAM |
| ZmHMGB1    | 157 | 17146 |            |        |
| ZmHMGB2    | 139 | 15316 |            |        |
| ZmHMGB3    | 138 | 15007 |            |        |
| ZmHMGB4    | 126 | 14104 |            |        |
| ZmHMGB5    | 123 | 13637 |            |        |
| ZmHMGB106  | 212 | 23534 |            |        |
| ZmHMGB107  | 127 | 14215 |            |        |

### ARID-HMG

|             |     |       |              |      |
|-------------|-----|-------|--------------|------|
| AtARID-HMG1 | 338 | 38774 | At1g76110    |      |
| AtARID-HMG2 | 319 | 36296 | At3g13350    |      |
| AtHMGB11    | 337 | 38049 | At1g55650    |      |
| AtHMGB15    | 448 | 50004 | At1g04880    |      |
| BdARID-HMG1 | 444 | 49374 | Bradi3g43310 | MIPS |

|             |     |       |            |       |
|-------------|-----|-------|------------|-------|
| GmHMGB1207  | 342 | 38529 |            |       |
| GmHMGB1208  | 313 | 35456 |            |       |
| MtHMGB1301  | 443 | 50132 |            |       |
| MtHMGB1302  | 424 | 47766 |            |       |
| OsHMGB702   | 467 | 51629 | Os02g27060 |       |
| OsHMGB709   | 300 | 34993 | Os09g37250 |       |
| PpHMGB1511  | 753 | 81975 |            |       |
| PtHMGB903   | 329 | 37740 |            |       |
| PtHMGB904   | 316 | 36023 |            |       |
| PtHMGB908   | 389 | 43825 |            |       |
| PtHMGB909   | 467 | 51892 |            |       |
| SbHMGB2601  | 455 | 50524 |            |       |
| SmARID-HMG1 | 446 | 50134 |            | GENOM |
| SmARID-HMG2 | 496 | 55792 |            | GENOM |
| StHMGB1401  | 314 | 35751 |            |       |
| VvHMGB6901  | 458 | 51094 |            |       |
| VvHMGB6902  | 328 | 37339 |            |       |
| VvHMGB6904  | 300 | 34108 |            |       |
| ZmHMGB115   | 442 | 49700 |            |       |

### 3xHMG-box

|              |     |       |              |       |
|--------------|-----|-------|--------------|-------|
| At3xHMG-box1 | 456 | 53231 | At4g23800    |       |
| At3xHMG-box2 | 446 | 52303 | At4g11080    |       |
| Bd3xHMG-box1 | 537 | 60501 | Bradi3g09690 | MIPS  |
| CpHMGB13004  | 470 | 55645 |              |       |
| GmHMGB1201   | 473 | 55698 |              |       |
| GmHMGB1206   | 478 | 56132 |              |       |
| OsHMGB704    | 504 | 56024 | Os02g15810   |       |
| PpHMGB1506   | 483 | 56028 |              | GENOM |
| PpHMGB1507   | 368 | 42921 |              | GENOM |
| PtHMGB912    | 498 | 58004 |              |       |
| PtHMGB913    | 480 | 56174 |              |       |
| RcHMGB20901  | 514 | 60136 |              |       |
| SbHMGB2603   | 488 | 55669 |              |       |
| Sm3xHMG-box1 | 457 | 52813 |              | GENOM |
| Sm3xHMG-box2 | 413 | 47880 |              | GENOM |
| VvHMGB6903   | 366 | 43326 |              |       |
| ZmHMGB108    | 487 | 55953 |              |       |

## SSRP1

|            |     |       |              |       |
|------------|-----|-------|--------------|-------|
| AtSSRP1    | 646 | 71646 | At3g28730    |       |
| BdSSRP1    | 643 | 71427 | Bradi2g33580 |       |
| BdSSRP2    | 641 | 70776 | Bradi2g05430 |       |
| CrSSRP3403 | 576 | 61145 |              |       |
| GmSSRP1201 | 579 | 65991 |              |       |
| GmSSRP1202 | 557 | 62444 |              |       |
| OsSSRP701  | 641 | 71334 | Os01g08970   |       |
| OsSSRP702  | 640 | 71048 | Os05g08970   |       |
| PtSSRP901  | 644 | 72498 |              |       |
| PtSSRP902  | 688 | 78278 |              |       |
| PpSSRP1501 | 674 | 74420 |              |       |
| PpSSRP     | 662 | 73084 |              | GENOM |
| SbSSRP2601 | 639 | 70441 |              |       |
| SbSSRP2602 | 639 | 71362 |              |       |
| SmSSRP     | 647 | 71678 |              | GENOM |
| VvSSRP6901 | 640 | 71534 |              |       |
| VcSSRP6401 | 645 | 69944 |              |       |
| ZmSSRP1    | 611 | 68309 |              |       |

<sup>1</sup>The species of which the protein sequences were retrieved are indicated as follows: *Arabidopsis thaliana* (At), *Brachypodium distachyon* (Bd), *Carica papaya* (Cp), *Chlamydomonas reinhardtii* (Cr), *Glycine max* (Gm), *Medicago truncatula* (Mt), *Oryza sativa* (Os), *Populus trichocarpa* (Pt), *Physcomitrella patens* (Pp), *Ricinus communis* (Rc), *Selaginella moellendorffii* (Sm), *Solanum tuberosum* (St), *Sorghum bicolor* (Sb), *Vitis vinifera* (Vv), *Volvox carteri* (Vc), *Zea mays* (Zm).

<sup>2</sup>For the majority of HMG-box proteins we use the published name or the name given in The Plant Chromatin Database. The remaining proteins were named according to the HMG-box family (HMGB, ARID-HMG, 3xHMG-box, SSRP1) they belong to, since in several cases the nomenclature in the different databases is inconsistent and/or the names are too long to be used in the phylogenetic trees (cf. Figs. 1, S1, S2).

<sup>3</sup>If available, the loci encoding the respective proteins are enclosed.

<sup>4</sup>Unless the amino acid sequence is retrieved from The Plant Chromatin Database (<http://www.chromdb.org>), the source of the respective sequence is indicated: SUPFAM (<http://supfam2.cs.bris.ac.uk>), MIPS (<http://mips.helmholtz-muenchen.de/plant/brachypodium/>), GENOM (<http://genome.jgi-psf.org>).

<sup>5</sup>The three amino acid sequences from *Chlamydomonas* contain two putative HMG-box domains.

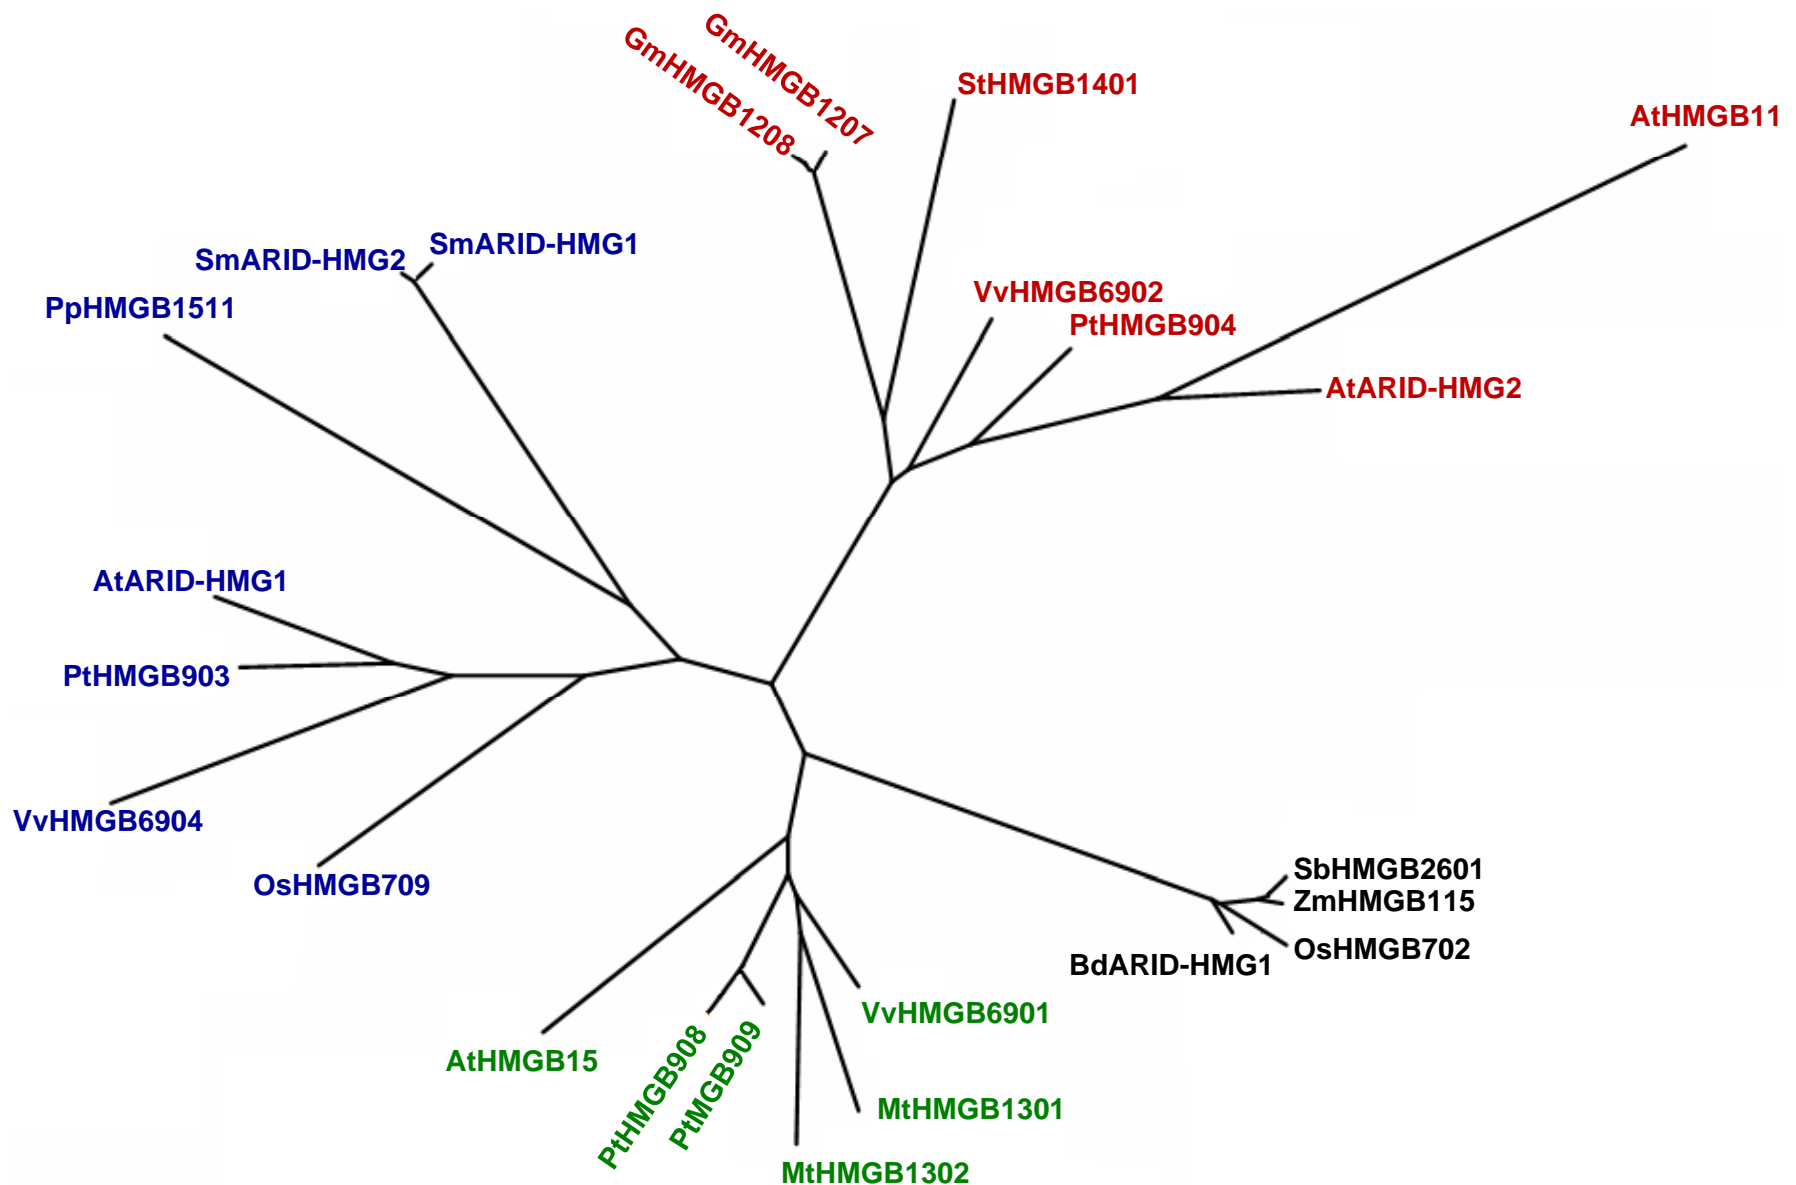

**Figure S1.** Amino acid sequence similarity of HMG-ARID proteins of different plant species (cf. Table S1 for designation of proteins and species). A multiple sequence alignment was generated and used to construct the shown neighbor-joining tree (<http://pbil.univ-lyon1.fr/software/seaview.html>). The sequences occur in four subgroups representing related monocot (in black) and dicot (in green) proteins, as well as a more distantly related dicot group (in red) and a group that contains in addition to monocot/dicot members sequences from *Physcomitrella* and *Selaginella* (in blue).

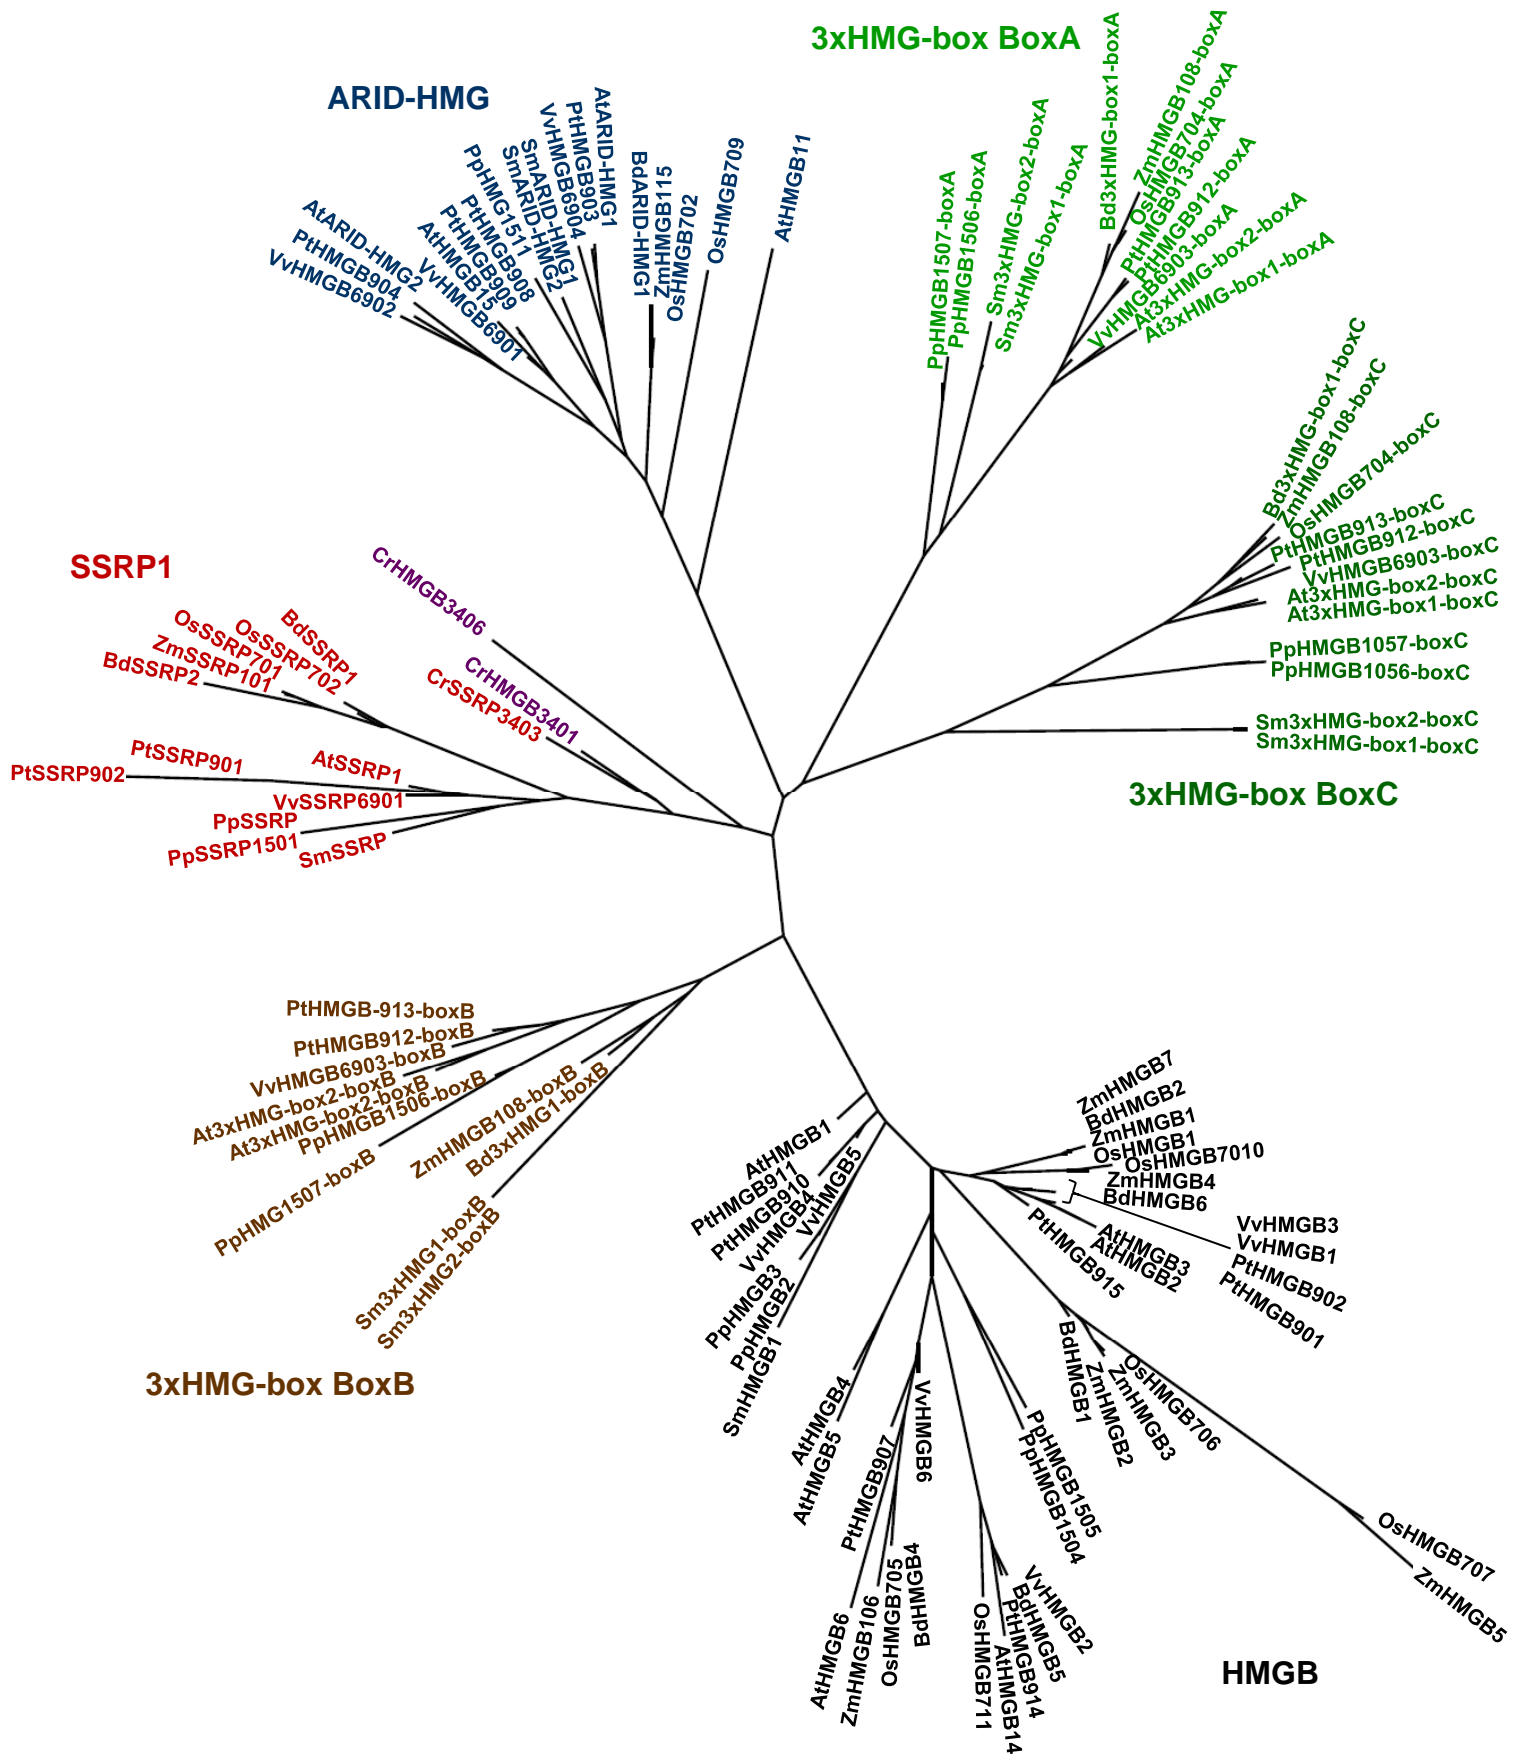

**Figure S2.** Amino acid sequence similarity of the individual HMG-box domains of the different plant HMG-box protein families (cf. Table S1). A multiple sequence alignment was generated and used to construct a neighbor-joining tree (<http://pbil.univ-lyon1.fr/software/seaview.html>). The sequences occur in subgroups representing the HMG-box domains originating from HMGB, SSRP1 and ARID-HMG proteins, except that the HMG domains of two putative *Clamydomonas* HMGB-type proteins (in violet) group with the SSRP1 domains. Moreover, the individual HMG-box domains of the 3xHMG-box proteins (termed BoxA, BoxB, BoxC) form separate groups.

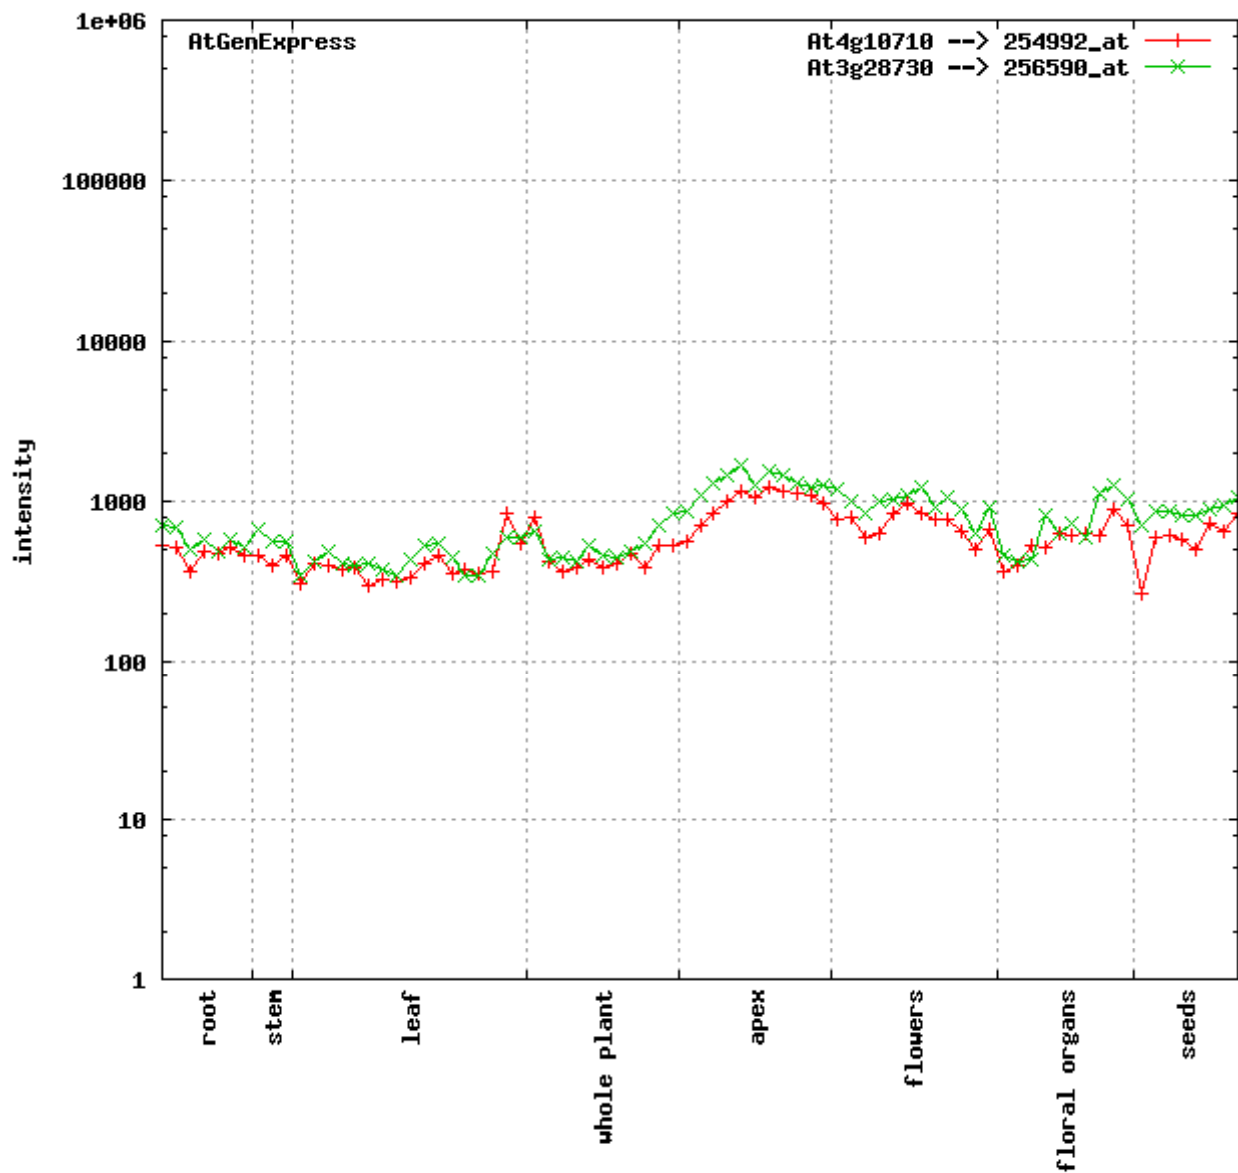

**Figure S3.** Similar expression of the genes encoding the FACT subunits SSRP1 (At3g28730) and SPT16 (At4g10710) in different *Arabidopsis* tissues. The data reflecting mRNA levels originate from a series of microarray experiments and are displayed using the AtGenExpress visualization tool (<http://jsp.weigelworld.org/expviz/expviz.jsp>).
